# Supplementary material
Source: PubMed Central journal article supplement (PMC6483007)
Supplement: jciinsight-4-124092-s106.pdf [file jciinsight-4-124092-s106.pdf]

## Supplementary Figures

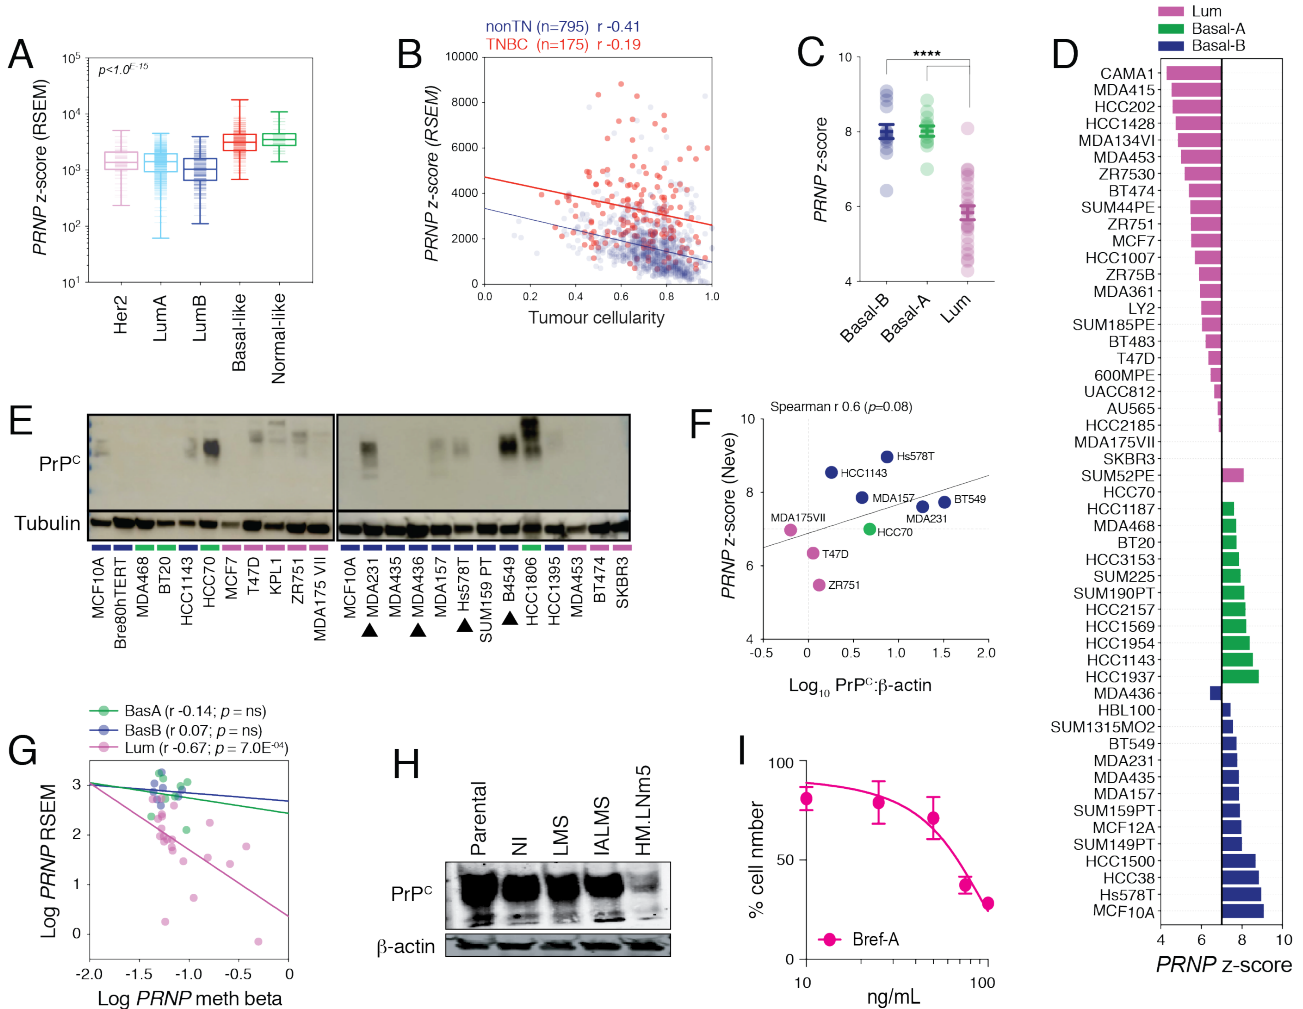

**Figure-S1. PrPC expression in breast tumors and cell lines.** [A] Analysis of *PRNP* mRNA expression in the TCGA dataset. *PRNP* is more highly expressed in basal-like and normal-like breast cancers compared to Her2-enriched or luminal A/B types ( $p$ -value indicated from non-parametric Kruskal-Wallis test). [B] Relationship between *PRNP* mRNA expression and tumor purity ( $r$ , correlation coefficient) (25). [C/D] *PRNP* mRNA levels in breast cancer cell lines according to cell line molecular subtype (26). [E] Western analysis of intracellular PrPC in selected cell lines (relative to Tubulin), arrows mark cell lines used for doxorubicin mechanistic studies. [F] Relationship between published *PRNP* z-scores and PrPC protein level (determined by densitometry of S1E). Spearman correlation coefficient ( $r$ ) and  $p$ -value indicated. [G] Relationship between *PRNP* expression and methylation at the *PRNP* genomic locus (average of probes) in breast cancer cell lines from the Daemen et al. dataset (27). [H] PrPC protein expression relative to β-actin across MDA231 clonal derivatives with increasing metastatic potential. [I] Brefeldin A dose curve for cellular toxicity.

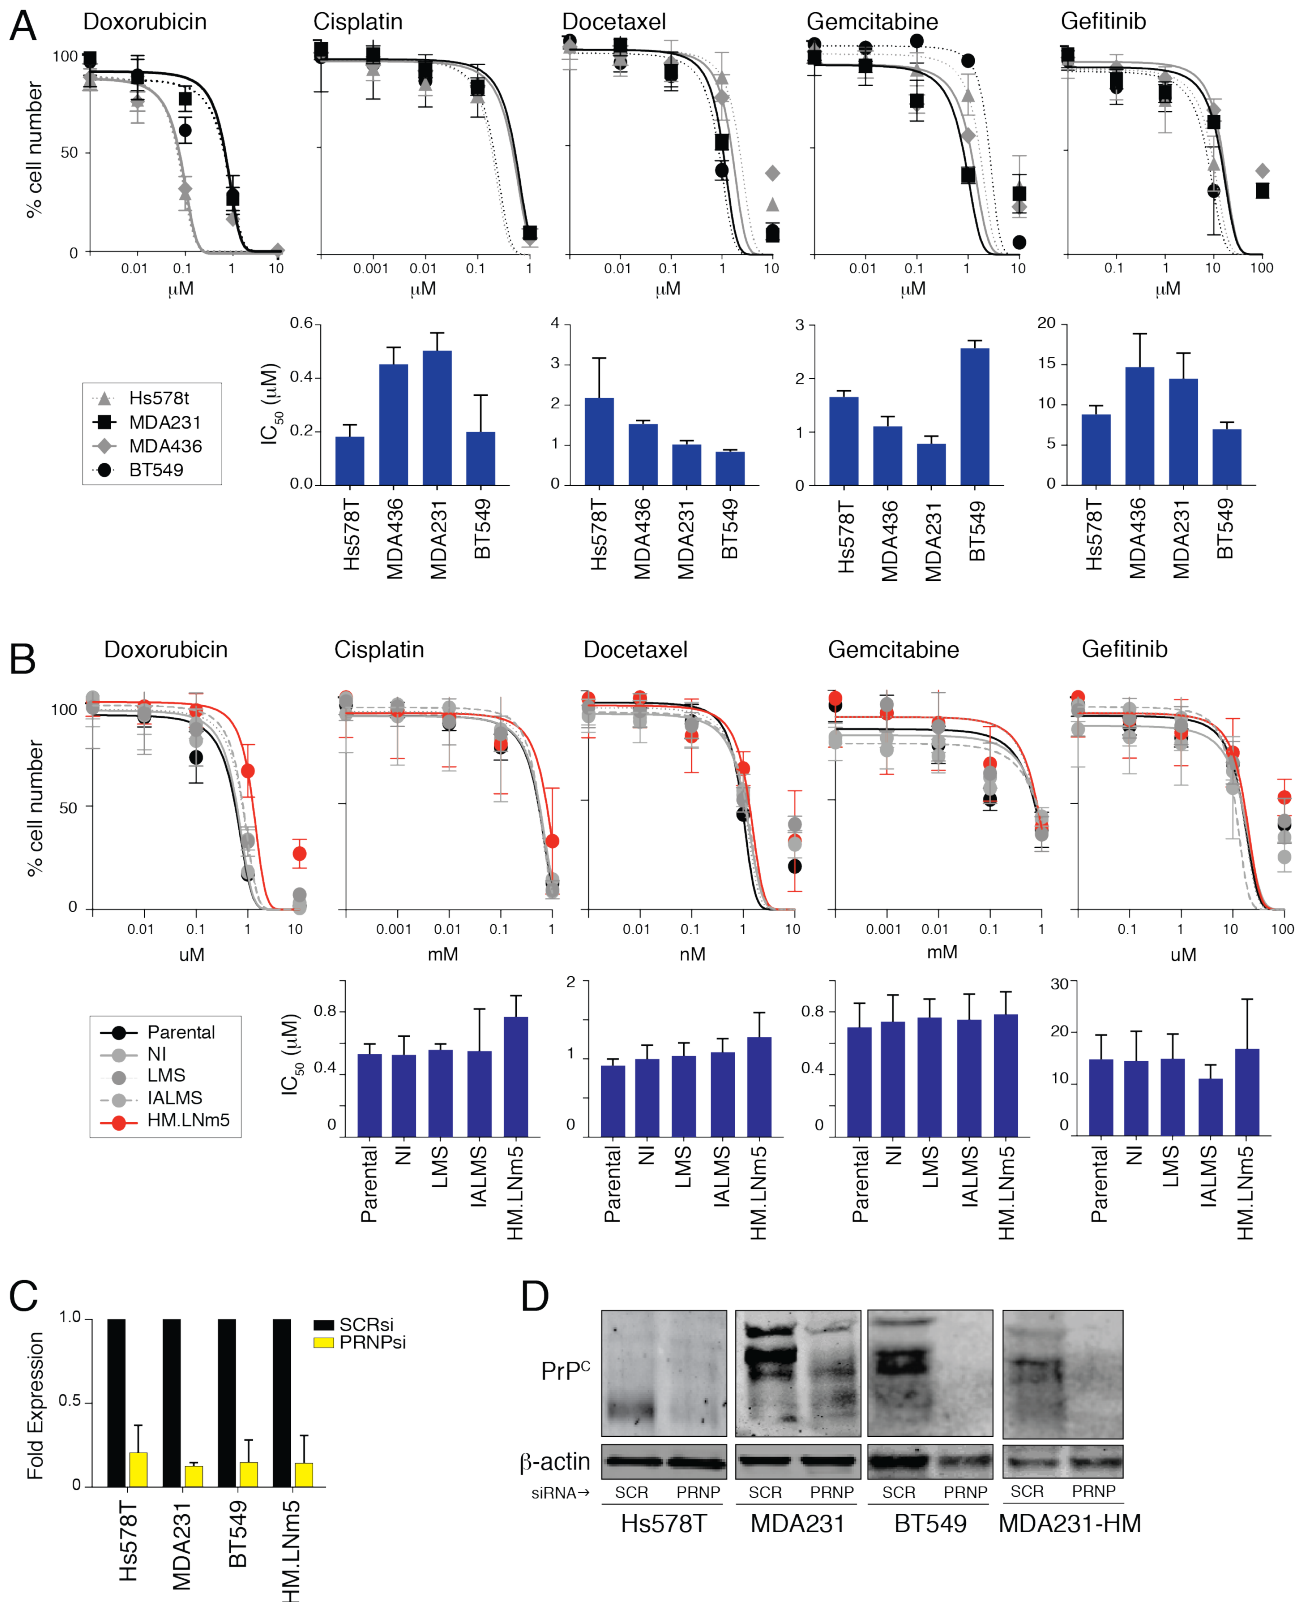

**Figure-S2. Soluble PrP<sup>C</sup> can mediate resistance to doxorubicin.** [A/B] Logarithmic dose-response curves for a set of standard chemotherapeutics in a range of cell lines expressing and secreting different levels of PrP<sup>C</sup>. Data shown are the means  $\pm$  SEM of triplicate experiments, with non-linear regression lines of best fit. [C] Analysis of *PRNP* mRNA expression by qRT-PCR 48h after transiently transfecting scrambled or *PRNP*-directed siRNA. [D] Western analysis of PrPC relative to  $\beta$ -actin 48h after transiently transfecting scrambled or *PRNP*-directed siRNA.

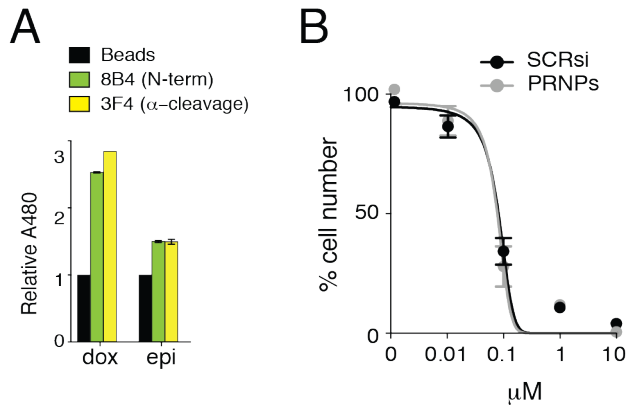

**Figure-S3. Effect of PrP<sup>C</sup> serum on doxorubicin efficacy *in vitro*.** [A] Co-immunoprecipitation of doxorubicin and epirubicin with PrP<sup>C</sup> using two different antibodies (mean  $\pm$  SEM is shown for three experiments). [B] Epirubicin dose-response assay in HM.LNm5 cells with and without siRNA-mediated depletion of PRNP.

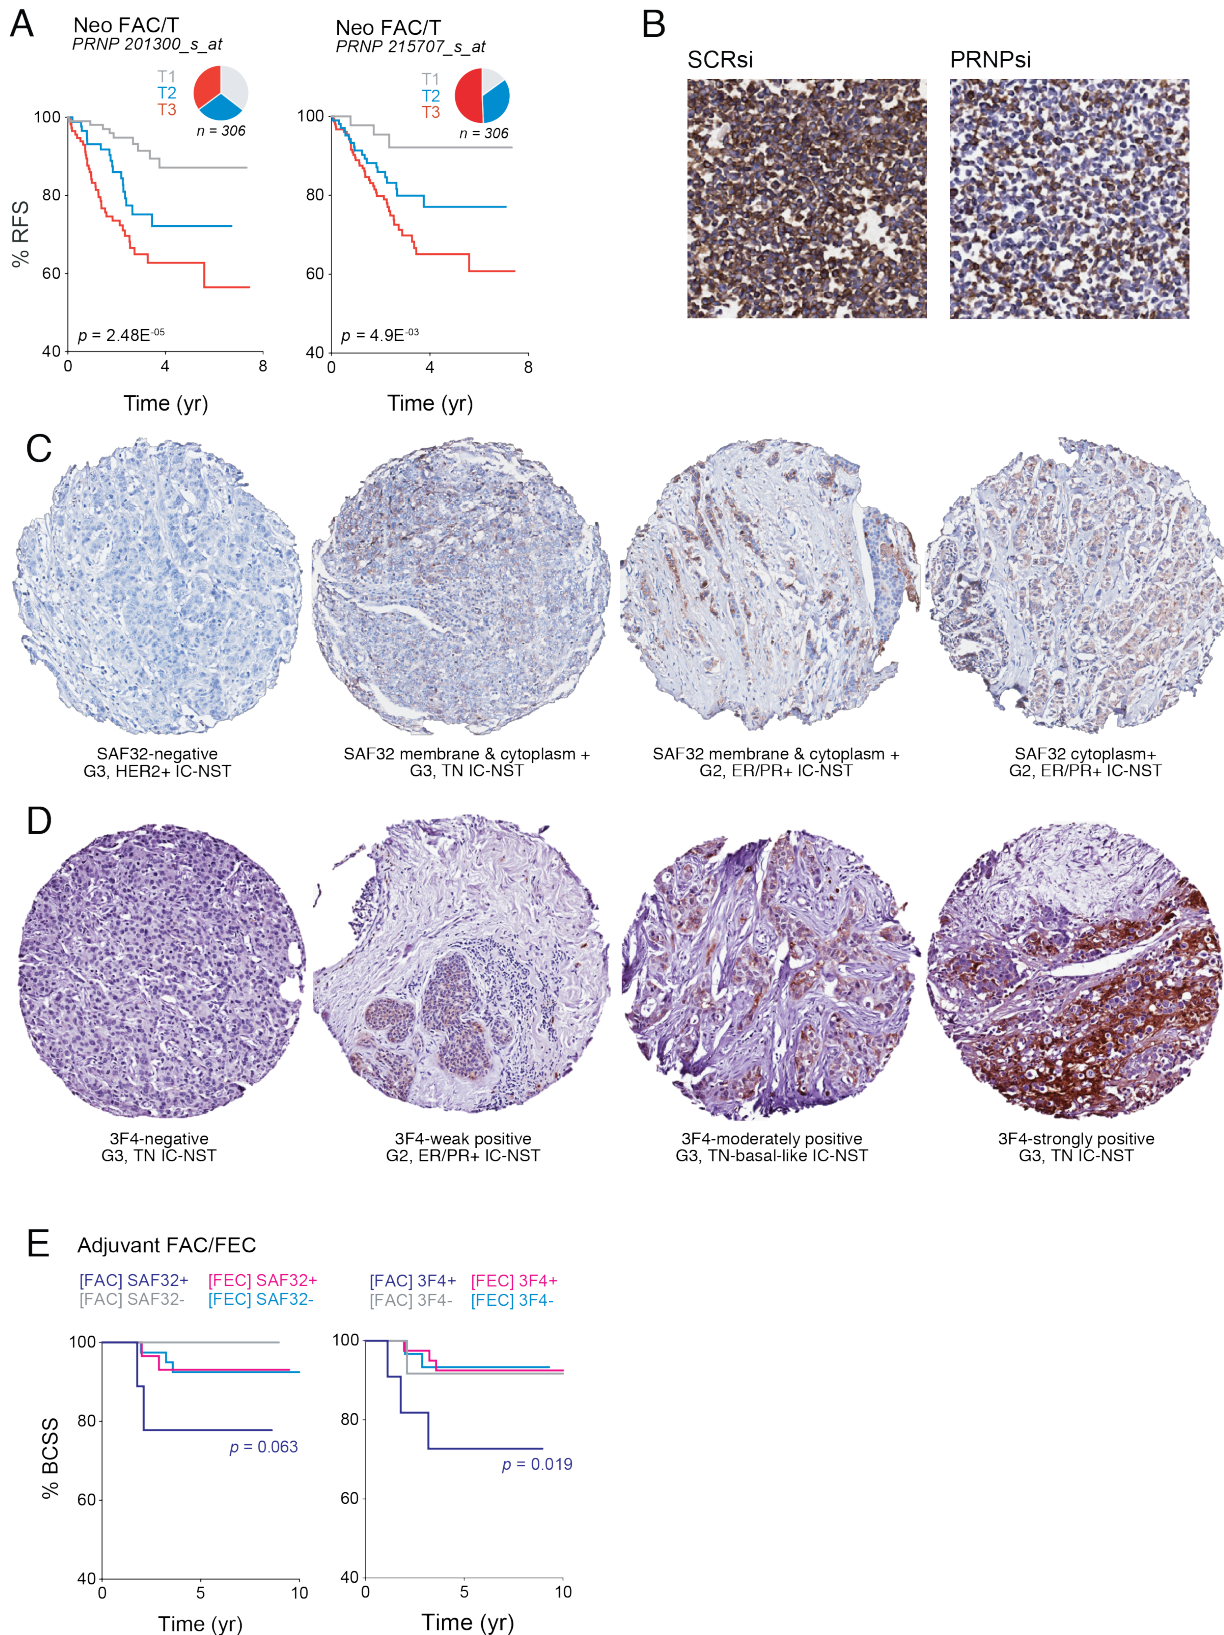

**Figure-S4. Relationships between tumor PrP<sup>C</sup> expression and clinical outcomes of breast cancer patients treated with anthracycline-based chemotherapy.** [A] Similar trends between *PRNP* expression and relapse-free survival (RFS) were observed with two different *PRNP* expression array probes. *PRNP* T1-3, RNA expression tertiles. [B] SAF32 antibody validation by IHC analysis of paraformaldehyde-fixed, pelleted and paraffin embedded MDA231 cells transiently transfected with control (SCR) or *PRNP*-specific siRNAs. [C-D] Additional examples of PrP<sup>C</sup> IHC staining with the SAF32 and 3F4 antibodies. [E] Kaplan Meier analysis of the relationships between PrP<sup>C</sup> protein isoforms and breast cancer specific survival (BCSS).
